# Supplementary material for: Reconstructing reef fish communities using fish otoliths in coral reef sediments
Source: PLoS One. 2019 Jun 14;14(6):e0218413. doi: 10.1371/journal.pone.0218413 (PMC6568422; doi:10.1371/journal.pone.0218413)
Supplement: S1 Table — Measurements were correlated in time by alignment to a regional coral 14C reference record (Fig 13). There were two potential dates of formation for measurements that crossed the coral reference, the bomb 14C rise (~1958–1970) and decline periods (post-1982). Two specimens fell outside these periods and were either pre-bomb (earlier than ~1958) or during the peak period (~1970–1982). Uncertainty for formation dates is approximately ± 2 years for the rise period and ± 5 years for the decline period based on 95% prediction intervals. (XLSX) [file pone.0218413.s008.xlsx]

## Sheet: 工作表1
Radiocarbon (14C) measurement of otoliths from the reef sediments in Caribbean Panama .
Collection location	Collection	Otolith	F14C	Rise formation	Decline formation
	date	mass (mg)	± 2SD
Punta Caracol	Nov./Dec. 2012	0.73	1.1002 ± 0.0025	1969.3	1989.6
Punta Caracol	Nov./Dec. 2013	0.73	1.0940 ± 0.0024	1968.9	1992.6
Punta Caracol	Nov./Dec. 2013	0.66	1.0987 ± 0.0023	1969.2	1990.3
Punta Caracol	Nov./Dec. 2013	0.56	1.0953 ± 0.0021	1969	1992
Punta Caracol	Nov./Dec. 2013	0.76	1.0997 ± 0.0024	1969.3	1989.8
Punta Caracol	Nov./Dec. 2013	0.68	1.0869 ± 0.0026	1968.4	1996.1
Punta Caracol	Nov./Dec. 2013	0.69	1.0976 ± 0.0022	1969.1	1990.9
Punta Caracol	Nov./Dec. 2013	0.56	1.0870 ± 0.0033	1968.4	1996
Punta Caracol	Nov./Dec. 2013	0.61	0.9144 ± 0.0024	Prebomb†	<1958
Punta Caracol	Nov./Dec. 2013	0.8	1.1399 ± 0.0038	Peak‡	1970–82
Cayo Adriana	Aug. 2014	0.89	1.0897 ± 0.0023	1968.6	1994.7
Cayo Adriana	Aug. 2014	0.86	1.0957 ± 0.0028	1969	1991.8
Cayo Adriana	Aug. 2014	0.81	1.0745 ± 0.0043	1967.6	2002.2
Cayo Adriana	Aug. 2014	0.88	1.1005 ± 0.0030	1969.3	1989.4
Cayo Adriana	Aug. 2014	0.69	1.0911 ± 0.0023	1968.7	1994
Cayo Adriana	Aug. 2014	0.61	1.0630 ± 0.0107	1966.9	2007.8
Cayo Adriana	Aug. 2014	0.68	1.0861 ± 0.0025	1968.4	1996.5
Cayo Adriana	Aug. 2014	0.79	1.0987 ± 0.0021	1969.2	1990.3
Cayo Adriana	Aug. 2014	0.83	1.0985 ± 0.0021	1969.2	1990.4
Cayo Adriana	Aug. 2014	0.84	1.0486 ± 0.0033	1965.9	2014.8
† Prebomb relates to the era prior to significant atmospheric nuclear testing (before 1954), but is phase lagged by a few years for the marine environment.
‡ The bomb 14C peak period of the tropical marine environment is lagged late relative to the atmospheric record by ~10 years and tends to form a plateau of values that are on average unchanged for over a decade but highly variable relative to the rise and decline periods.
